# Supplementary material
Source: PubMed Central journal article supplement (PMC7383743)
Supplement: FSB2-34-8475-s001.pdf [file FSB2-34-8475-s001.pdf]

Supplemental Figures for:

## **Disruption of mitochondrial dynamics increases stress resistance through activation of multiple stress response pathways**

Emily Machiela<sup>1#</sup>, Thomas Lontis<sup>2,3#</sup>, Dylan J. Dues<sup>1#</sup>, Paige Rudich<sup>2,3</sup>, Annika Traa<sup>2,3</sup>, Leslie Wyman<sup>1</sup>, Corah Kaufman<sup>1</sup>, Jason F. Cooper<sup>1</sup>, Leira Lew<sup>1</sup>, Saravanapriah Nadarajan<sup>4</sup>, Megan M. Senchuk<sup>1</sup>, Jeremy M. Van Raamsdonk<sup>1,2,3,4</sup>

<sup>1</sup>Laboratory of Aging and Neurodegenerative Disease, Center for Neurodegenerative Science, Van Andel Research Institute, Grand Rapids, MI, USA

<sup>2</sup>Department of Neurology and Neurosurgery, McGill University, Montreal, Quebec, Canada

<sup>3</sup>Metabolic Disorders and Complications Program, and Brain Repair and Integrative Neuroscience Program, Research Institute of the McGill University Health Centre, Montreal, Quebec, Canada

<sup>4</sup>Department of Genetics, Harvard Medical School, Boston, MA, USA

#These authors contributed equally to this work

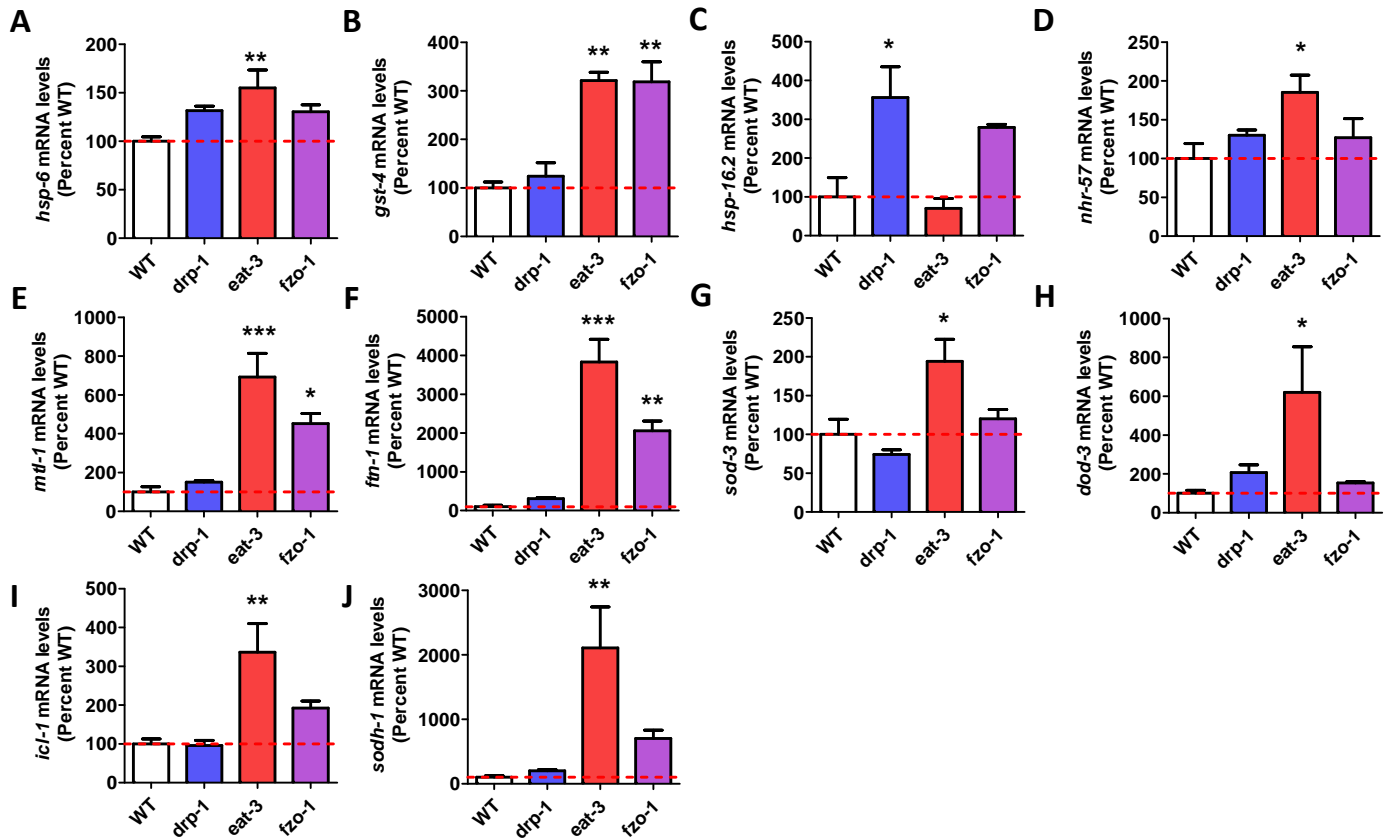

**Supplemental Fig. S1 Disruption of mitochondrial fusion genes results in upregulation of genes involved in stress response pathways.** To examine the activation of stress response pathways in mitochondrial fission and fusion mutants, quantitative real-time RT-PCR was used to measure the levels of transcriptional targets of different stress response pathways in day 1 pre-fertile young adult animals. **A.** *hsp-6* levels were used to measure the activation of the mitochondrial unfolded protein response. **B.** *gst-4* levels were used to measure the activation of the SKN-1-mediated oxidative stress response. **C.** *hsp-16.2* levels were used to measure the activation of the heat shock response (note worms were not induced with heat stress). **D.** *nhr-57* levels were used to measure the activation of the HIF-1-mediated hypoxia response. Activation of the DAF-16-mediated stress response was measured by examining the levels of **E.** *mtl-1*, **F.** *ftn-1*, **G.** *sod-3*, **H.** *dod-3*, **I.** *icl-1*, and **J.** *sodh-1*. With the exception of *hsp-16.2*, *eat-3* fusion mutants showed a significant upregulation of all of these stress response genes. *fzo-1* worms also exhibited upregulation of many stress response genes. Error bars represent SEM. Significance indicates difference from wild-type worms. \* $p < 0.05$ , \*\* $p < 0.01$ , \*\*\* $p < 0.001$

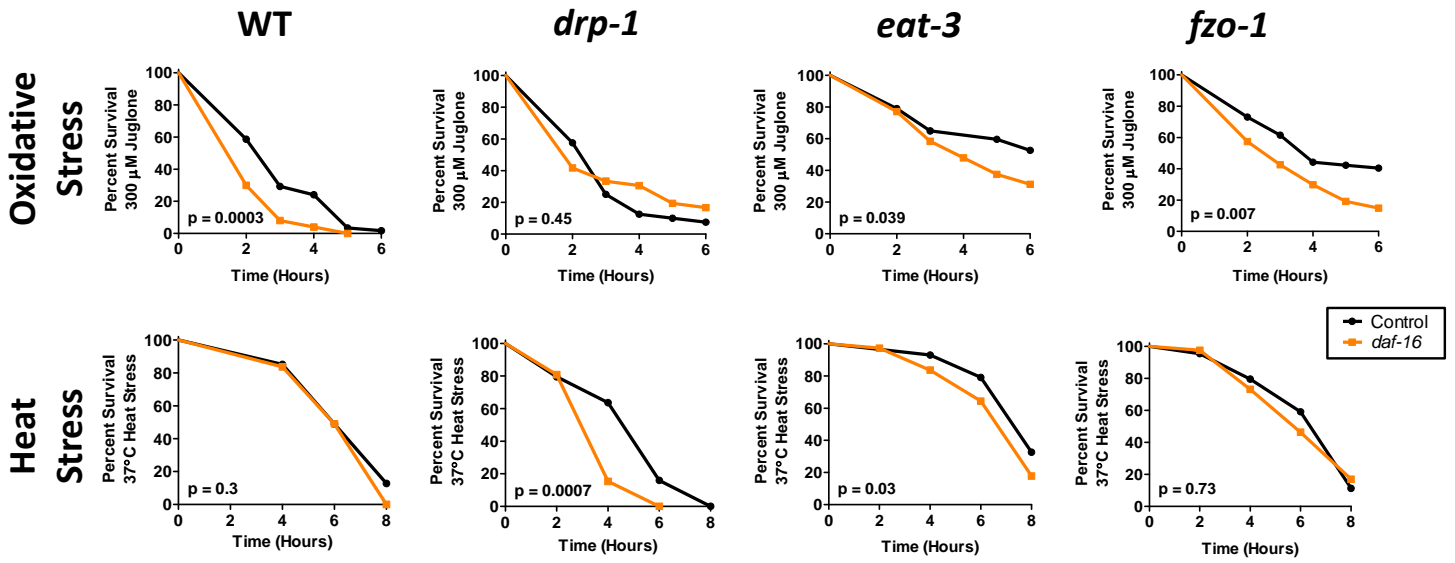

**Supplemental Fig. S2 DAF-16 is required for increased resistance to oxidative stress in mitochondrial fusion mutants.** To determine the extent to which activation of the DAF-16 mediated stress response pathway contributes to the increased resistance to stress in the mitochondrial fission and fusion mutants, *drp-1*, *eat-3* and *fzo-1* worms were crossed to *daf-16(mu86)* null mutants. Sensitivity to oxidative stress was assessed by exposing worms to 300  $\mu$ M juglone, while sensitivity to heat stress was assessed at 37°C. Loss of DAF-16 significantly increased sensitivity to both oxidative and heat stress in *eat-3* worms, and significantly increased sensitivity to oxidative stress in *fzo-1* worms. Black line indicates control worms (WT, *drp-1*, *eat-3*, *fzo-1*). Orange line indicates worms with *daf-16* mutants (*daf-16*, *drp-1;daf-16*, *eat-3;daf-16*, *fzo-1;daf-16*)
